# Supplementary material
Source: Royal Society of Chemistry journal article supplement (doi:10.1039/d6md00363j)
Supplement: d6md00363j1.pdf [file d6md00363j1.pdf]

## Supplemental material

### Rational design of an environment-sensitive fluorescent probe for monitoring butyrylcholinesterase activity and its application in Alzheimer's Disease

Ning Guo<sup>a, b, #</sup>, Feng Wang<sup>b, e, #</sup>, Yu Wang<sup>b</sup>, Jiahao Du<sup>b</sup>, Qingwen Zhang<sup>b</sup>, Wenting Cao<sup>b</sup>, Jiongtao  
Su<sup>b</sup>, Fenqin Zhao<sup>b</sup>, Junfeng Wang<sup>d</sup>, Xiaobin Pang<sup>b</sup>, Yuemin Zhou<sup>c, \*</sup>, Lin Yan<sup>b, \*</sup>

<sup>a</sup> *Department of Pharmacy, Huaihe Hospital of Henan University, Kaifeng, Henan, 475004, China*

<sup>b</sup> *State Key Laboratory of Antiviral Drugs, School of Pharmacy, Henan University, N. Jinming Ave., Kaifeng, Henan, 475004, China*

<sup>c</sup> *Department of Plastic Surgery, The Second Affiliated Hospital of Zhengzhou University, Zhengzhou, Henan, 450000, China*

<sup>d</sup> *Gordon Center for Medical Imaging, Department of Radiology, Massachusetts General Hospital, Harvard Medical School, 125 Nashua St, Boston, MA, 02149, USA*

<sup>e</sup> *Department of Pharmacy, Nanyang Medical College, Nanyang, Henan, 473004, China*

*Correspondence: Yueminzhou2@hotmail.com (Y. Zhou); yanlin@henu.edu.cn (L. Yan)*

#### Contents:

1. Other figures
2. NMR and ESI-HRMS spectra

#### **1. Other figures** \_\_\_\_\_

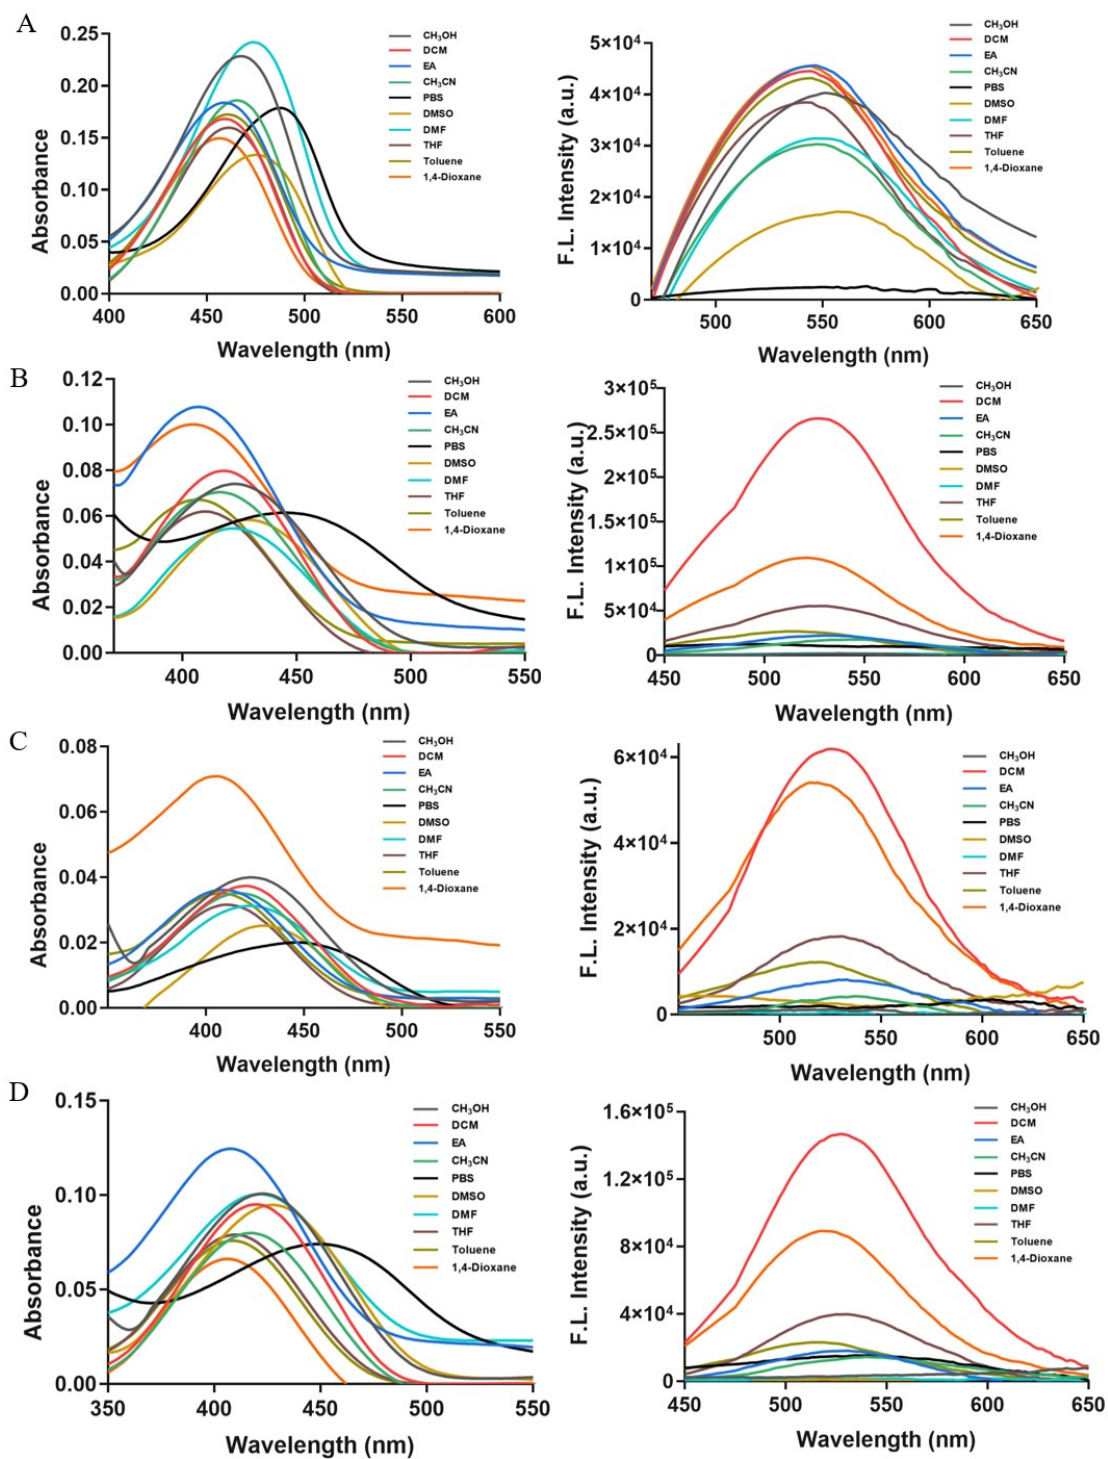

**Fig. S1** UV absorption and fluorescence emission spectra of LY1 (A), LY2 (B), LY34 (C), LY36 (D) in different solvents.

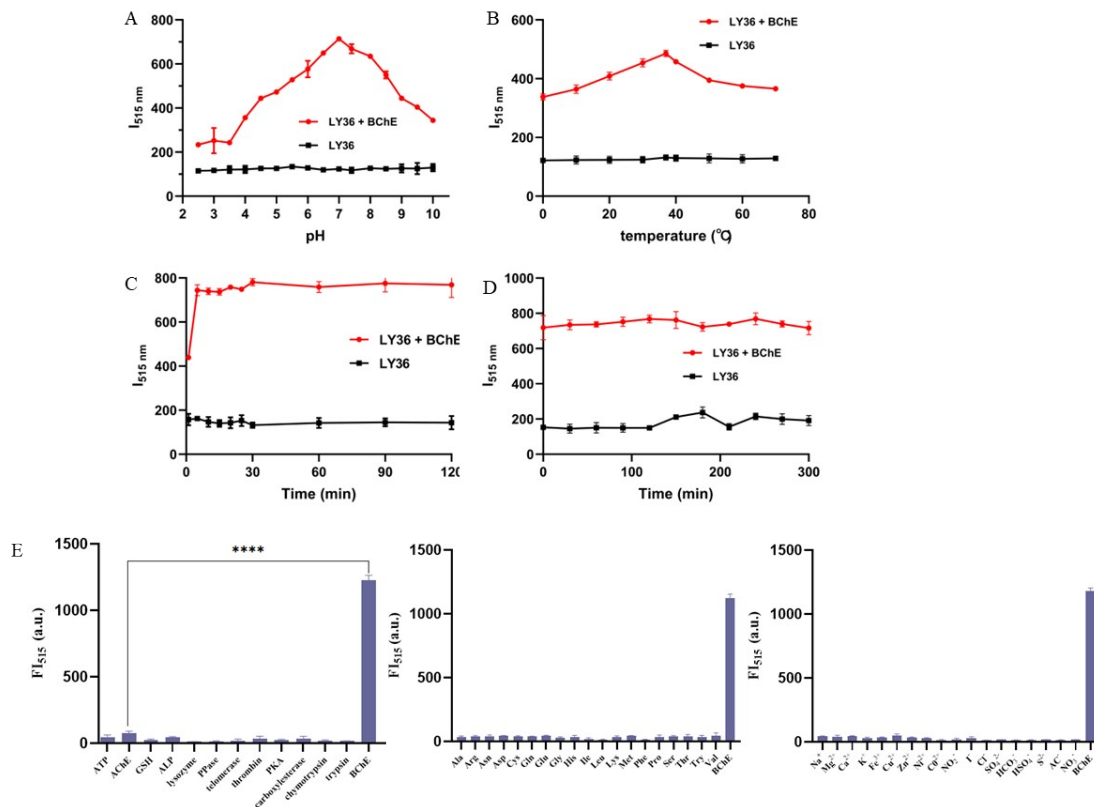

**Fig. S2** (A) pH-dependent FI<sub>515</sub> of **LY36** before (black line) and after (red line) treatment with BChE for 30 min in PBS (10 mM, pH 2.5-10). (B) Temperature-dependent FI<sub>515</sub> of **LY36** before (black line) and after (red line) treatment with BChE in PBS from 0 to 70 °C. (C) Time-dependent FI<sub>515</sub> of **LY36** before (black line) and after (red line) treatment with BChE from 0 to 120 min in PBS (10 mM, pH 7.4). (D) FI<sub>515</sub> of **LY36** in the absence (black line) or presence (red line) of BChE under continuous excitation light irradiation at 37 °C in PBS buffer. (E) FI<sub>515</sub> changes of **LY36** upon treatment with different ions, amino acids and macromolecules. [**LY36**] = 500 nM, [BChE] = 500 nM,  $\lambda_{\text{exc}} = 450$  nm. (Data are means  $\pm$  SEM, n = 3).

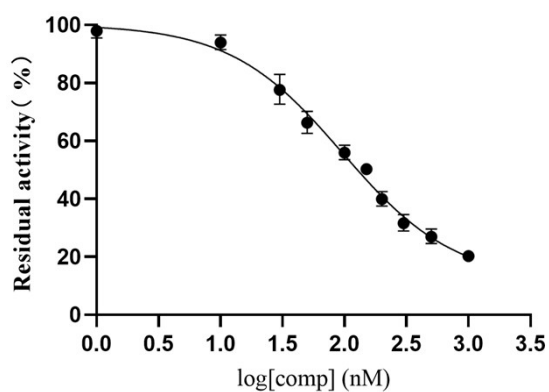

**Fig. S3** Residual activity (%) of **LY36** against BChE at various concentrations. (Data are means  $\pm$  SEM, n = 3).

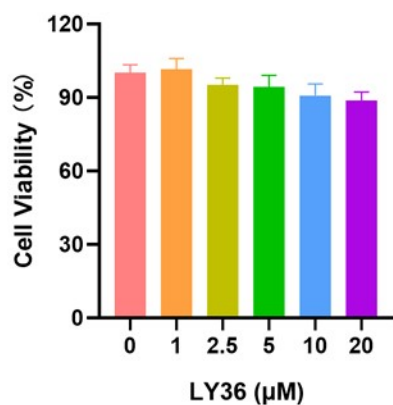

**Fig. S4** Cell viability (%) of probe LY36 in SH-SY5Y cells after 24 h. (Data are means  $\pm$  SEM, n = 3).

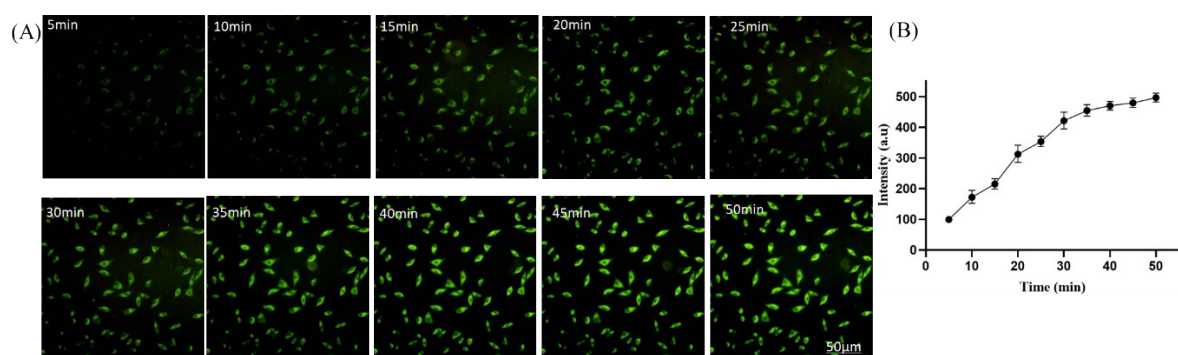

**Fig. S5** (A) Real-time fluorescence imaging of SH-SY5Y cells after incubation with 5  $\mu$ M LY36 for 5-50 min.  $\lambda_{\text{ex}} = 450$  nm,  $\lambda_{\text{em}} = 480$ -540 nm. (B) Average fluorescence intensity of the corresponding cells. Scale bar = 50  $\mu$ m.

## 2. NMR and ESI-HRMS spectra

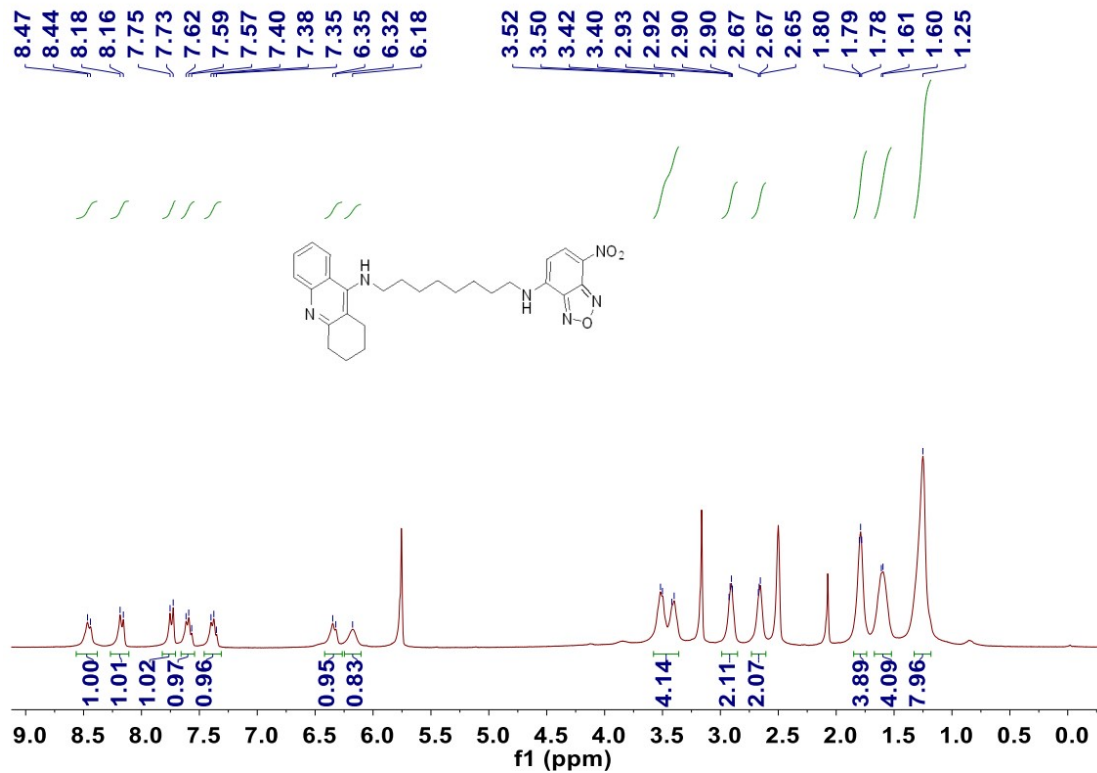

Fig. S6  $^1\text{H}$  NMR of LY1

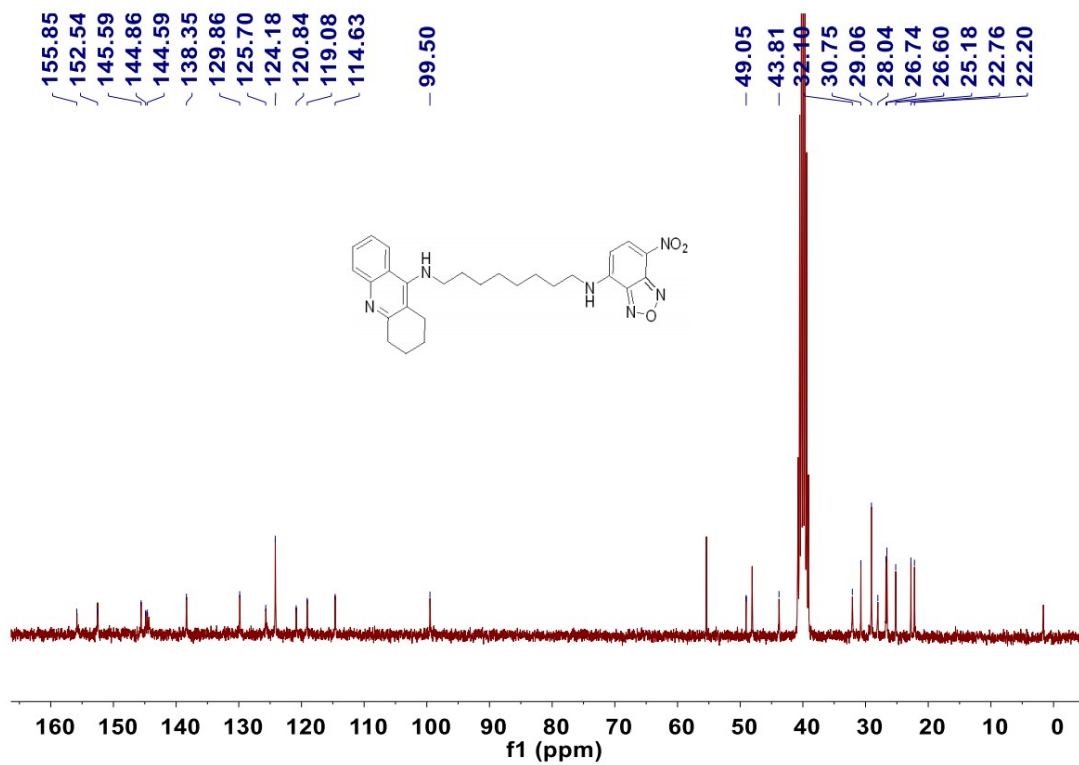

Fig. S7  $^{13}\text{C}$  NMR of LY1

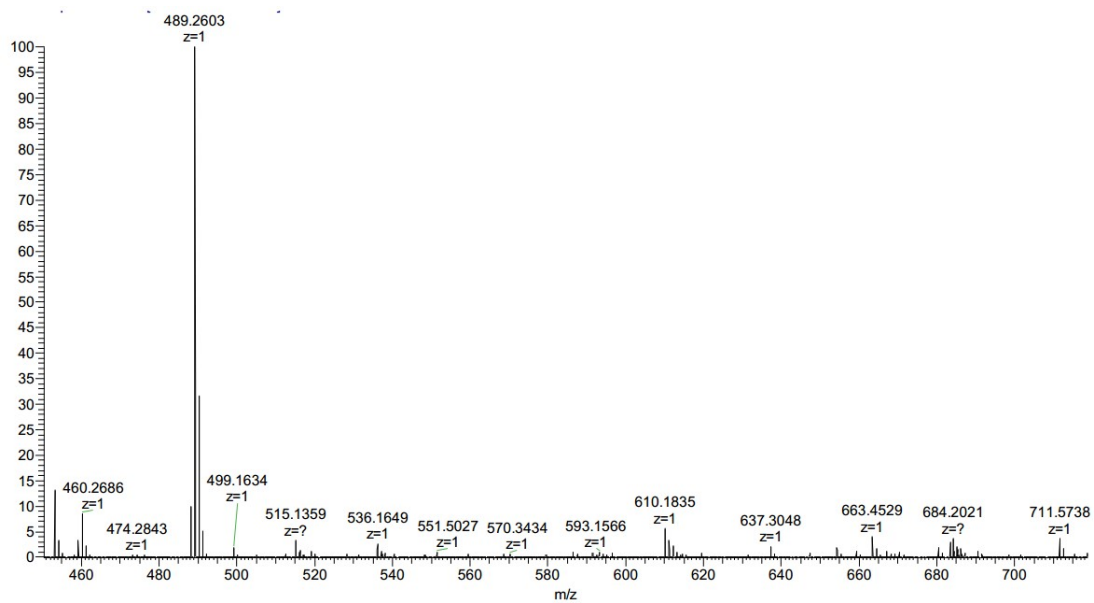

Fig. S8 HRMS of LY1

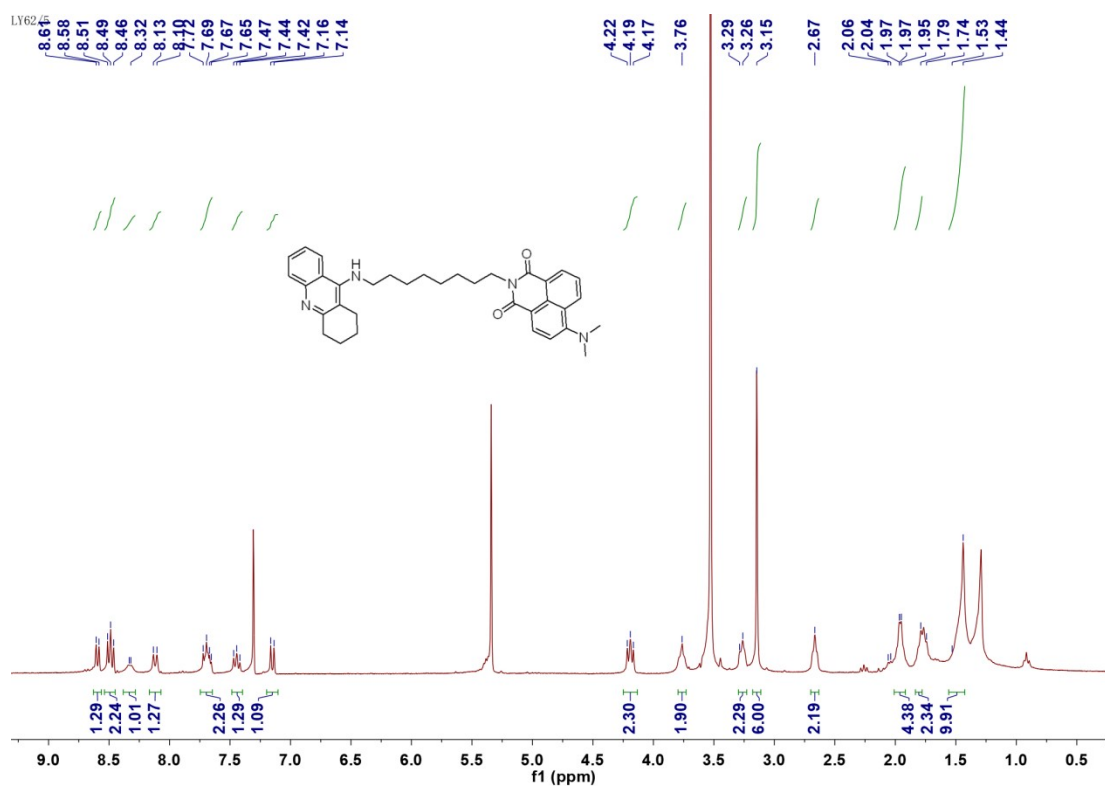

Fig. S9 <sup>1</sup>H NMR of LY2

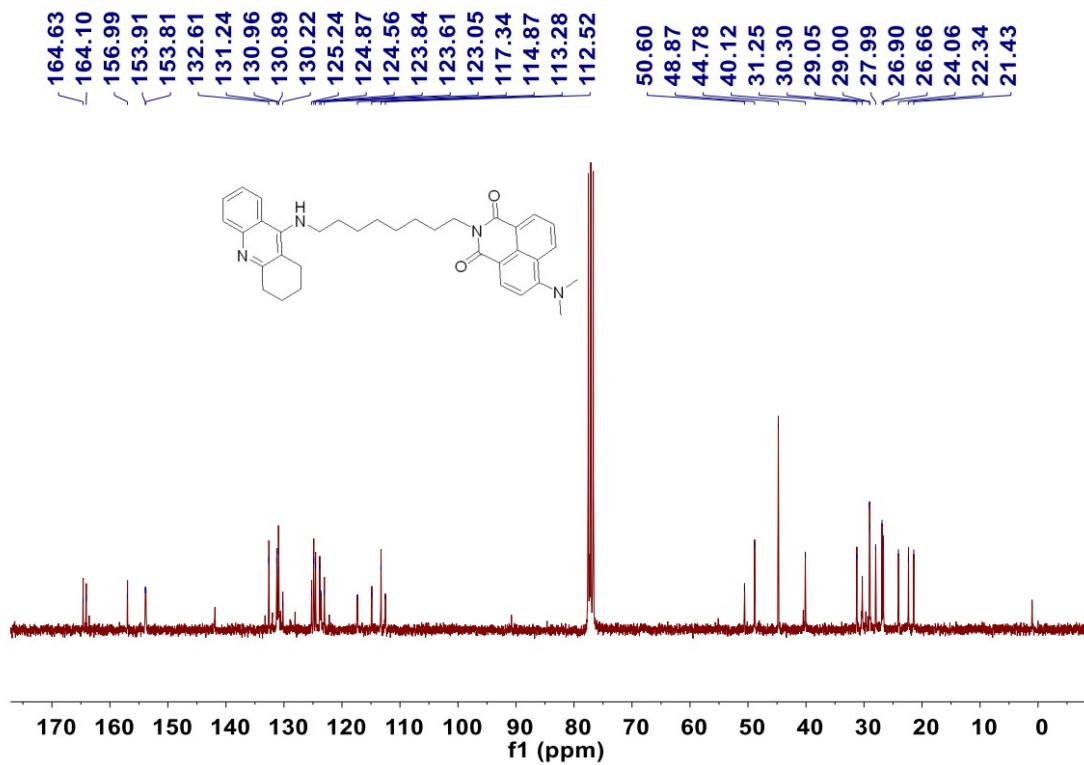

Fig. S10 <sup>13</sup>C NMR of LY2

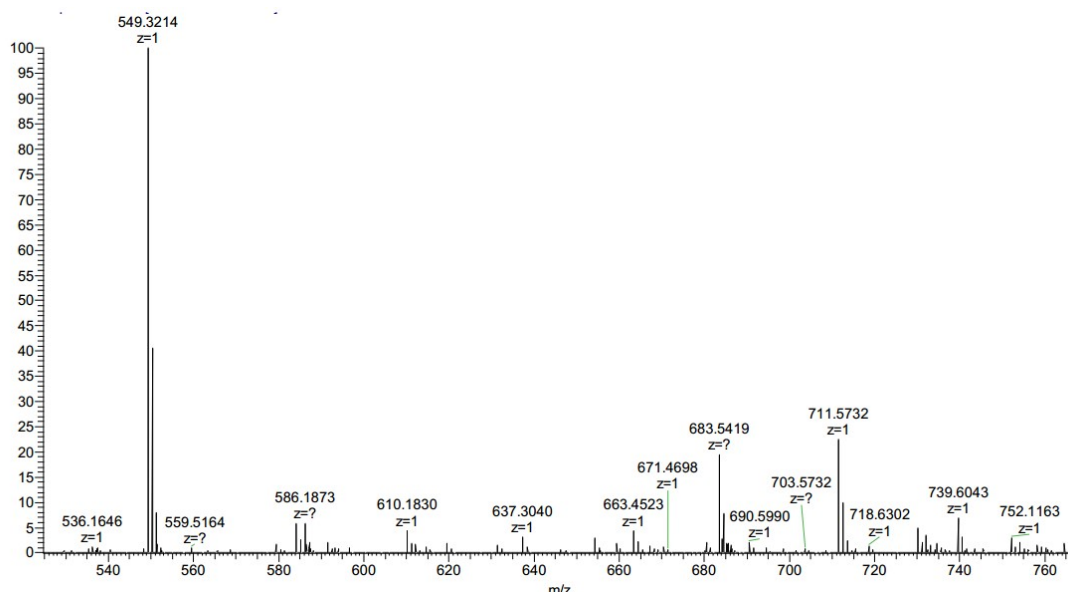

Fig. S11 HRMS of LY2

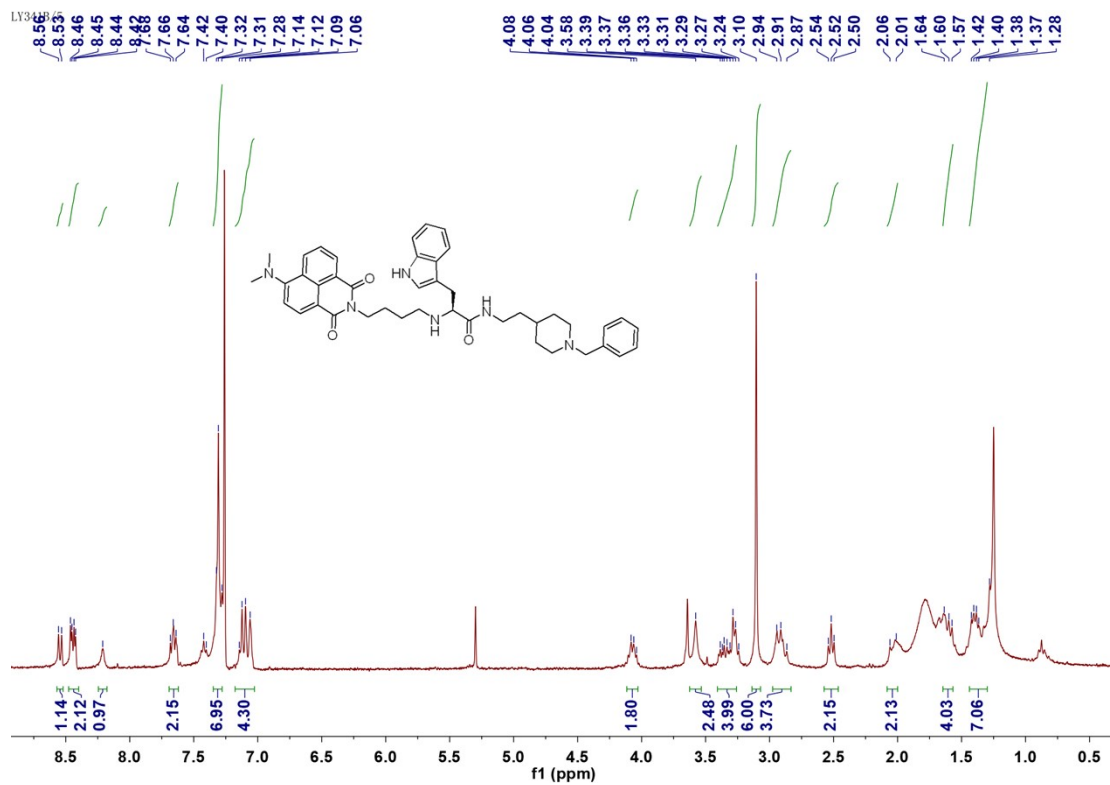

Fig. S12  $^1\text{H}$  NMR of LY34

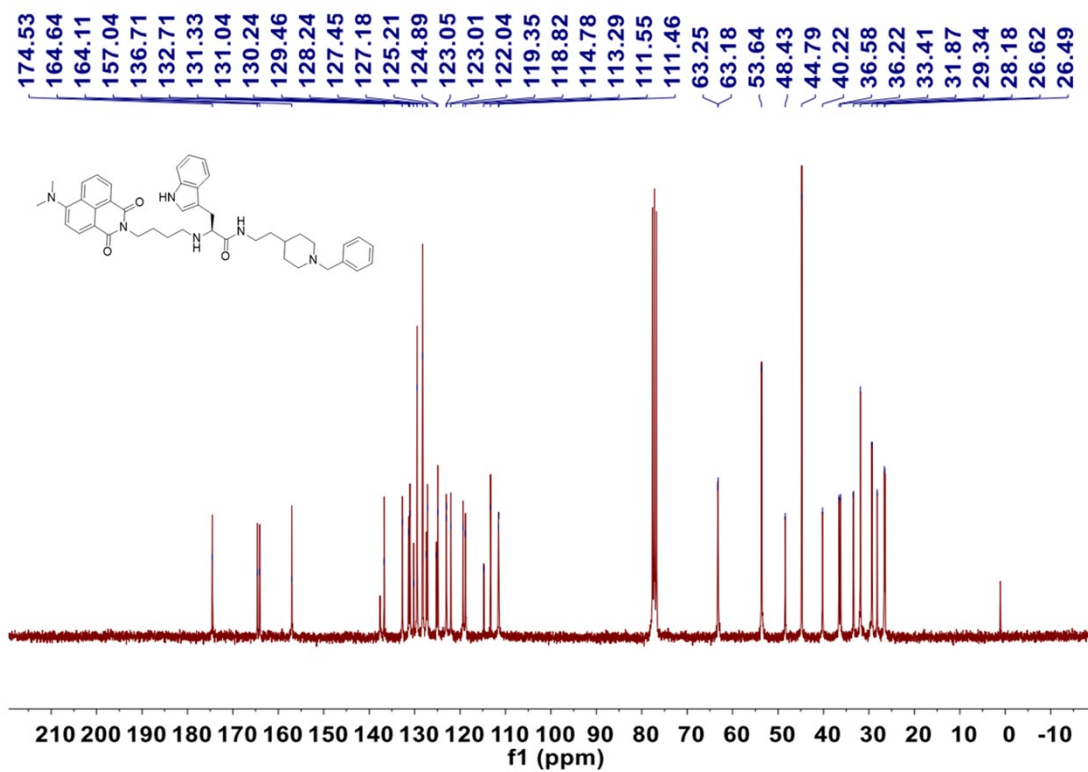

Fig. S13  $^{13}\text{C}$  NMR of LY34

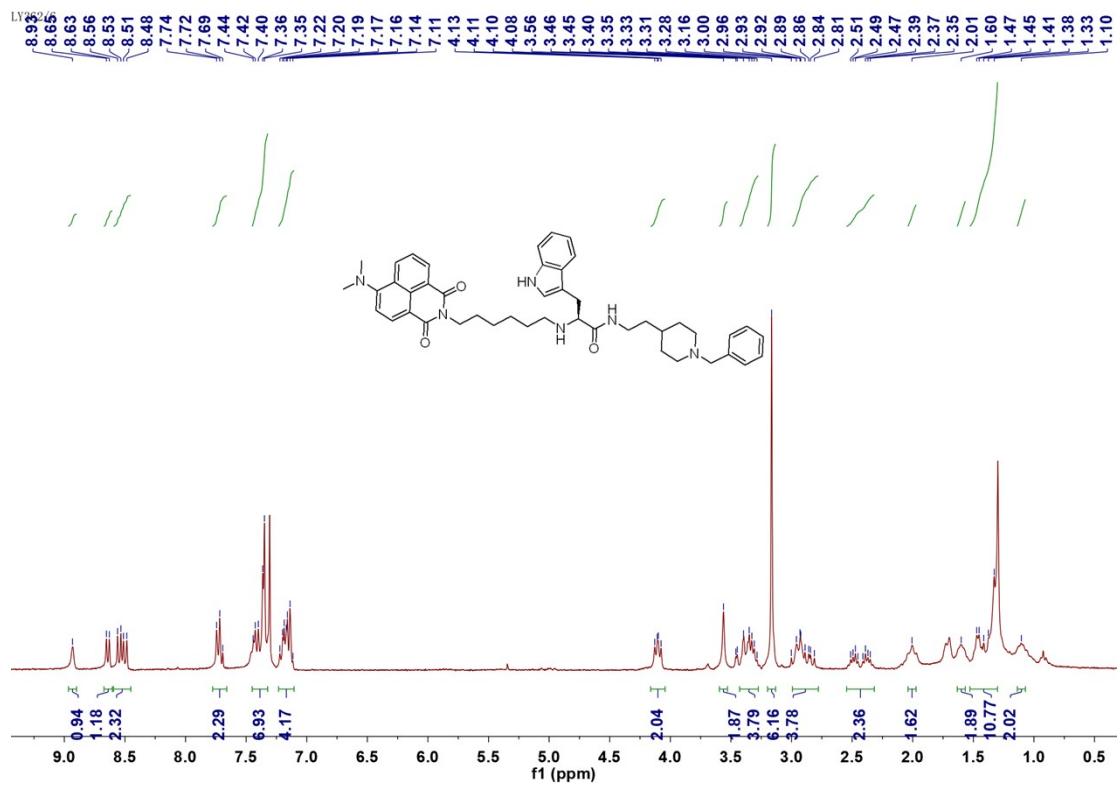

Fig. S14  $^1\text{H}$  NMR of LY36

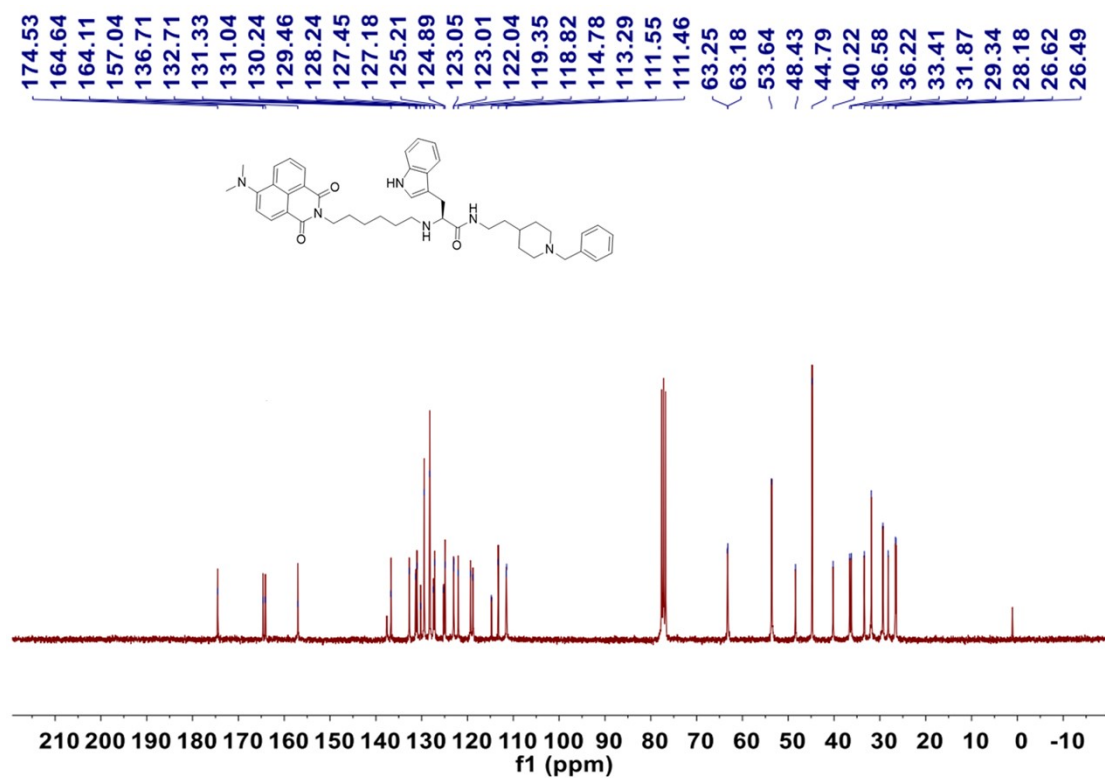

Fig. S15  $^{13}\text{C}$  NMR of LY36

LY36 #15 RT: 0.15 AV: 1 NL: 1.86E7  
T: FTMS + p ESI Full ms [100.0000-1000.0000]

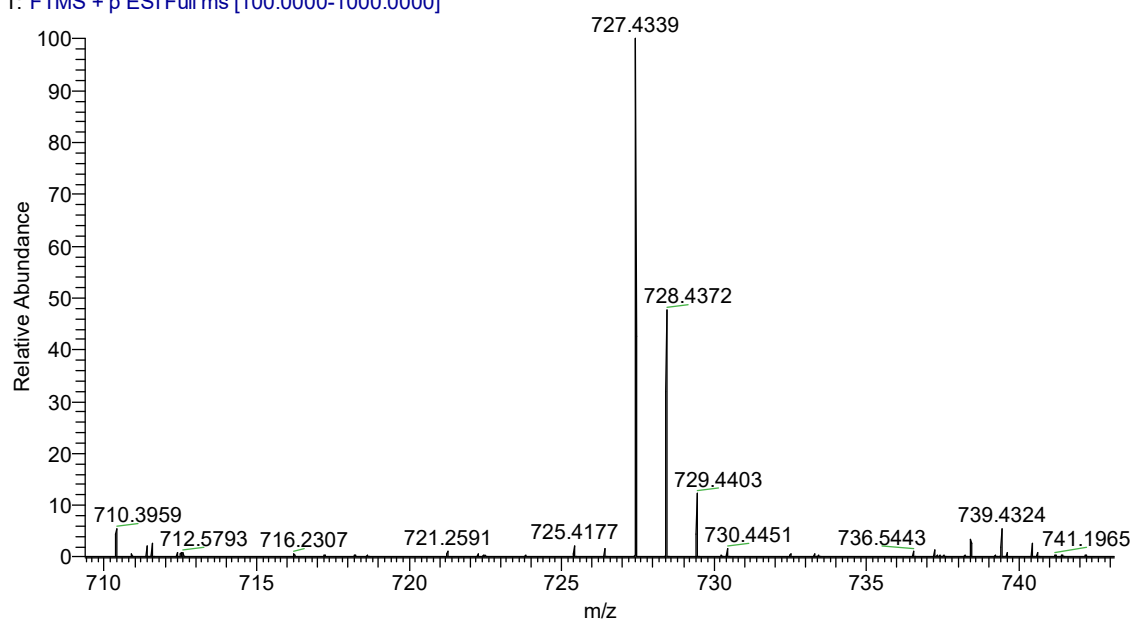

**Fig. S16** ESI-HRMS of **LY36**
